# Supplementary material for: An in situ combinatorial methodology to synthesize and screen chemical probes
Source: Royal Society of Chemistry journal article supplement (doi:10.1039/c8cc06991c), 2019-01-01
Supplement: c8cc06991c1.xlsx [file c8cc06991c1.xlsx]

## Sheet: Total Spectrum Count
20180213_A.J.Zouwen, Samples report created on 06/15/2018
Experiment: 20180213_A.J.Zouwen
	Peak List Generator: unknown
		Version: unknown
		Charge States Calculated: unknown
		Deisotoped: unknown
		Textual Annotation: unknown
	Database Set: 1 Database
		Database Name: the escherichia_coli_reviewed_23022prot_prot_Max database
			Version: unknown
			Taxonomy: All Entries
			Number of Proteins: 23023
		Does database contain common contaminants?: unknown
	Search Engine Set: 1 Search Engine
		Search Engine: PEAKS Studio
			Version: 8.5 (2017-08-04)
			Samples: All Samples
			Fragment Tolerance: 0.50 Da (Monoisotopic)
			Parent Tolerance: 0.100 Da (Monoisotopic)
			Fixed Modifications: +57 on C (Carbamidomethyl)
			Variable Modifications: +1 on NQ (Deamidated), +16 on M (Oxidation)
			Database: the escherichia_coli_reviewed_23022prot_prot_Max database (unknown version, 23023 entries)
			Digestion Enzyme: Trypsin
			Max Missed Cleavages: 3
			Probability Model:
				04_AJZ_b_AT (peptides_1_0_0.mzid): Peptide Prophet with Delta Mass Correction (No decoys found) [all charge states]
				04_AJZ_b_AT (peptides_1_1_0.mzid): Peptide Prophet with Delta Mass Correction (No decoys found) [all charge states]
				06_AJZ_c_AT (peptides_1_0_0.mzid): Peptide Prophet with Delta Mass Correction (No decoys found) [all charge states]
				06_AJZ_c_AT (peptides_1_1_0.mzid): Peptide Prophet with Delta Mass Correction (No decoys found) [all charge states]
				07_AJZ_b_SF1 (peptides_1_0_0.mzid): Peptide Prophet with Delta Mass Correction (No decoys found) [all charge states]
				07_AJZ_b_SF1 (peptides_1_1_0.mzid): Peptide Prophet with Delta Mass Correction (No decoys found) [all charge states]
				08_AJZ_b_SF2 (peptides_1_0_0.mzid): Peptide Prophet with Delta Mass Correction (No decoys found) [all charge states]
				08_AJZ_b_SF2 (peptides_1_1_0.mzid): Peptide Prophet with Delta Mass Correction (No decoys found) [all charge states]
				12_AJZ_c_SF1 (peptides_1_0_0.mzid): Peptide Prophet with Delta Mass Correction (No decoys found) [all charge states]
				12_AJZ_c_SF1 (peptides_1_1_0.mzid): Peptide Prophet with Delta Mass Correction (No decoys found) [all charge states]
				13_AJZ_c_SF2 (peptides_1_0_0.mzid): Peptide Prophet with Delta Mass Correction (No decoys found) [all charge states]
				13_AJZ_c_SF2 (peptides_1_1_0.mzid): Peptide Prophet with Delta Mass Correction (No decoys found) [all charge states]
	Scaffold: Version: Scaffold_4.8.4
		Modification Metadata Set: 2334 modifications
			Source: C:\Program Files\Scaffold 4\parameters\unimod.xml
			Comment:
		Protein Grouping Strategy: Experiment-wide grouping with protein cluster analysis
		Peptide Thresholds: 20.0% minimum
		Protein Thresholds: 20.0% minimum and 1 peptide minimum
		Peptide FDR: 3.3% (Prophet)
		Protein FDR: 2.8% (Prophet)
		GO Annotation Source(s):
		Alternate ID Source(s): FASTA:UniProt/Swiss-Prot (UniProtKB)
									Total Spectrum Count	Total Spectrum Count	Total Spectrum Count	Total Spectrum Count	Total Spectrum Count	Total Spectrum Count
20180213_A.J.Zouwen									Uncategorized Sample	Uncategorized Sample	Uncategorized Sample	Uncategorized Sample	Uncategorized Sample	Uncategorized Sample
#	Visible?	Starred?	Identified Proteins (91)	Accession Number	Alternate ID	Molecular Weight	Protein Grouping Ambiguity	Taxonomy	b_AT	c_AT	b_SF1	b_SF2	c_SF1	c_SF2
1	TRUE	Empty	Bifunctional ligase/repressor BirA OS=Escherichia coli (strain K12) GN=birA PE=1 SV=1	BIRA_ECOLI	birA	35 kDa		unknown	352	168	76	44	32	4
2	TRUE	Empty	Chloramphenicol acetyltransferase OS=Escherichia coli GN=cat PE=1 SV=1	CAT_ECOLX	cat	26 kDa		unknown			210	174	62	34
3	TRUE	Empty	60 kDa chaperonin 1 OS=Escherichia coli O1:K1 / APEC GN=groL1 PE=3 SV=1	CH601_ECOK1 (+19)	groL1	57 kDa		unknown	216	86	22	10	24	6
4	TRUE	Empty	30S ribosomal protein S4 OS=Escherichia coli O139:H28 (strain E24377A / ETEC) GN=rpsD PE=3 SV=1	RS4_ECO24 (+20)	rpsD	23 kDa		unknown			52	54	30	24
5	TRUE	Empty	Maltose-binding periplasmic protein OS=Escherichia coli O157:H7 GN=malE PE=1 SV=1	MALE_ECO57 (+1)	malE	43 kDa		unknown	24	44	16	16	20	8
6	TRUE	Empty	Elongation factor Tu 1 OS=Escherichia coli O139:H28 (strain E24377A / ETEC) GN=tuf1 PE=3 SV=1	EFTU1_ECO24 (+15)	tuf1	43 kDa		unknown	6	16	22	16	14	6
7	TRUE	Empty	3-oxoacyl-[acyl-carrier-protein] reductase FabG OS=Escherichia coli (strain K12) GN=fabG PE=1 SV=1	FABG_ECOLI	fabG	26 kDa		unknown			22	18	10	6
8	TRUE	Empty	Glyceraldehyde-3-phosphate dehydrogenase A OS=Escherichia coli O157:H7 GN=gapA PE=3 SV=2	G3P1_ECO57 (+2)	gapA	36 kDa		unknown	14	26	8	4	2
9	TRUE	Empty	Outer membrane protein F OS=Escherichia coli (strain K12) GN=ompF PE=1 SV=1	OMPF_ECOLI	ompF	39 kDa		unknown	4	14	18	4	6	2
10	TRUE	Empty	50S ribosomal protein L4 OS=Escherichia coli O139:H28 (strain E24377A / ETEC) GN=rplD PE=3 SV=1	RL4_ECO24 (+20)	rplD	22 kDa		unknown			20	6	14
11	TRUE	Empty	Uracil phosphoribosyltransferase OS=Escherichia coli O139:H28 (strain E24377A / ETEC) GN=upp PE=3 SV=1	UPP_ECO24 (+19)	upp	23 kDa		unknown			16	14	8	2
12	TRUE	Empty	cAMP-activated global transcriptional regulator CRP OS=Escherichia coli O157:H7 GN=crp PE=3 SV=1	CRP_ECO57 (+2)	crp	24 kDa		unknown			16	10	8	4
13	TRUE	Empty	FMN-dependent NADH-azoreductase OS=Escherichia coli O139:H28 (strain E24377A / ETEC) GN=azoR PE=3 SV=1	AZOR_ECO24 (+2)	azoR	22 kDa		unknown			20	12	2
14	TRUE	Empty	Malate dehydrogenase OS=Escherichia coli O139:H28 (strain E24377A / ETEC) GN=mdh PE=3 SV=1	MDH_ECO24 (+17)	mdh	32 kDa		unknown	12	12		4	4	2
15	TRUE	Empty	Transaldolase OS=Escherichia coli O104:H4 (strain 2009EL-2071) GN=tal PE=1 SV=1	TAL_ECO1E	tal	35 kDa		unknown	8	12	4	4	2
16	TRUE	Empty	30S ribosomal protein S3 OS=Escherichia coli O139:H28 (strain E24377A / ETEC) GN=rpsC PE=3 SV=1	RS3_ECO24 (+19)	rpsC	26 kDa		unknown			8	6	8	6
17	TRUE	Empty	Alkyl hydroperoxide reductase subunit C OS=Escherichia coli O157:H7 GN=ahpC PE=3 SV=2	AHPC_ECO57 (+2)	ahpC	21 kDa		unknown		4	8	8	6
18	TRUE	Empty	KHG/KDPG aldolase OS=Escherichia coli O157:H7 GN=eda PE=3 SV=1	ALKH_ECO57 (+2)	eda	22 kDa		unknown			14	2	2	2
19	TRUE	Empty	Cysteine synthase A OS=Escherichia coli O157:H7 GN=cysK PE=3 SV=2	CYSK_ECO57 (+1)	cysK	34 kDa		unknown	8	12
20	TRUE	Empty	Elongation factor Ts OS=Escherichia coli (strain 55989 / EAEC) GN=tsf PE=3 SV=1	EFTS_ECO55 (+19)	tsf	30 kDa		unknown	4	14		2
21	TRUE	Empty	50S ribosomal protein L6 OS=Escherichia coli O139:H28 (strain E24377A / ETEC) GN=rplF PE=3 SV=1	RL6_ECO24 (+20)	rplF	19 kDa		unknown			6	14
22	TRUE	Empty	Outer membrane protein A OS=Escherichia coli O157:H7 GN=ompA PE=3 SV=1	OMPA_ECO57 (+1)	ompA	37 kDa		unknown	6	12
23	TRUE	Empty	50S ribosomal protein L2 OS=Escherichia coli O139:H28 (strain E24377A / ETEC) GN=rplB PE=3 SV=1	RL2_ECO24 (+20)	rplB	30 kDa		unknown			6	8	4
24	TRUE	Empty	Purine nucleoside phosphorylase DeoD-type OS=Escherichia coli O6:H1 (strain CFT073 / ATCC 700928 / UPEC) GN=deoD PE=3 SV=2	DEOD_ECOL6	deoD	26 kDa		unknown			6	4	4	4
25	TRUE	Empty	Elongation factor P OS=Escherichia coli O139:H28 (strain E24377A / ETEC) GN=efp PE=3 SV=1	EFP_ECO24 (+20)	efp	21 kDa		unknown			4	6	6	2
26	TRUE	Empty	50S ribosomal protein L3 OS=Escherichia coli O139:H28 (strain E24377A / ETEC) GN=rplC PE=3 SV=1	RL3_ECO24 (+20)	rplC	22 kDa		unknown			6	4	4	2
27	TRUE	Empty	Chaperone protein DnaK OS=Escherichia coli O139:H28 (strain E24377A / ETEC) GN=dnaK PE=3 SV=1	DNAK_ECO24 (+8)	dnaK	69 kDa		unknown			14
28	TRUE	Empty	Glyoxylate/hydroxypyruvate reductase A OS=Escherichia coli O127:H6 (strain E2348/69 / EPEC) GN=ghrA PE=3 SV=1	GHRA_ECO27 (+18)	ghrA	35 kDa		unknown		12
29	TRUE	Empty	Ribose-phosphate pyrophosphokinase OS=Escherichia coli O157:H7 GN=prs PE=3 SV=2	KPRS_ECO57 (+2)	prs	34 kDa		unknown	2	10
30	TRUE	Empty	Pyruvate dehydrogenase E1 component OS=Escherichia coli O157:H7 GN=aceE PE=1 SV=2	ODP1_ECO57 (+1)	aceE	100 kDa		unknown			6	2	4
31	TRUE	Empty	Superoxide dismutase [Mn] OS=Escherichia coli O157:H7 GN=sodA PE=3 SV=2	SODM_ECO57 (+1)	sodA	23 kDa		unknown			12
32	TRUE	Empty	Oxygen-insensitive NAD(P)H nitroreductase OS=Escherichia coli (strain K12) GN=nfsB PE=1 SV=1	NFSB_ECOLI	nfsB	24 kDa		unknown				12
33	TRUE	Empty	3-oxoacyl-[acyl-carrier-protein] synthase 3 OS=Escherichia coli O6:K15:H31 (strain 536 / UPEC) GN=fabH PE=3 SV=1	FABH_ECOL5 (+8)	fabH	34 kDa		unknown	2	8
34	TRUE	Empty	Thioredoxin 1 OS=Escherichia coli O157:H7 GN=trxA PE=1 SV=2	THIO_ECO57 (+2)	trxA	12 kDa		unknown	2				6	2
35	TRUE	Empty	Oxygen-insensitive NADPH nitroreductase OS=Escherichia coli (strain K12) GN=nfsA PE=1 SV=2	NFSA_ECOLI	nfsA	27 kDa		unknown			4	2	4
36	TRUE	Empty	3-oxoacyl-[acyl-carrier-protein] synthase 2 OS=Escherichia coli O157:H7 GN=fabF PE=3 SV=2	FABF_ECO57 (+2)	fabF	43 kDa		unknown		8
37	TRUE	Empty	Succinate--CoA ligase [ADP-forming] subunit beta OS=Escherichia coli O139:H28 (strain E24377A / ETEC) GN=sucC PE=3 SV=1	SUCC_ECO24 (+14)	sucC	41 kDa		unknown			2	2	4
38	TRUE	Empty	Ribose-5-phosphate isomerase A OS=Escherichia coli O139:H28 (strain E24377A / ETEC) GN=rpiA PE=3 SV=1	RPIA_ECO24 (+19)	rpiA	23 kDa		unknown			2	4	2
39	TRUE	Empty	5-methyltetrahydropteroyltriglutamate--homocysteine methyltransferase OS=Escherichia coli O157:H7 (strain EC4115 / EHEC) GN=metE PE=3 SV=1	METE_ECO5E (+3)	metE	85 kDa		unknown		4			4
40	TRUE	Empty	Stringent starvation protein A OS=Escherichia coli O157:H7 GN=sspA PE=3 SV=2	SSPA_ECO57 (+2)	sspA	24 kDa		unknown					2	6
41	TRUE	Empty	Succinate dehydrogenase iron-sulfur subunit OS=Escherichia coli (strain K12) GN=sdhB PE=1 SV=1	SDHB_ECOLI	sdhB	27 kDa		unknown					6
42	TRUE	Empty	3-oxoacyl-[acyl-carrier-protein] synthase 1 OS=Escherichia coli O6:H1 (strain CFT073 / ATCC 700928 / UPEC) GN=fabB PE=3 SV=1	FABB_ECOL6 (+1)	fabB	43 kDa		unknown		4	2
43	TRUE	Empty	Serine hydroxymethyltransferase OS=Escherichia coli O139:H28 (strain E24377A / ETEC) GN=glyA PE=3 SV=1	GLYA_ECO24 (+20)	glyA	45 kDa		unknown			6
44	TRUE	Empty	D-tagatose-1,6-bisphosphate aldolase subunit GatZ OS=Escherichia coli O127:H6 (strain E2348/69 / EPEC) GN=gatZ PE=3 SV=1	GATZ_ECO27 (+9)	gatZ	47 kDa		unknown		4	2
45	TRUE	Empty	Citrate synthase OS=Escherichia coli (strain K12) GN=gltA PE=1 SV=1	CISY_ECOLI (+1)	gltA	48 kDa		unknown			2	4
46	TRUE	Empty	Molybdopterin adenylyltransferase OS=Escherichia coli O157:H7 GN=mog PE=3 SV=1	MOG_ECO57 (+1)	mog	21 kDa		unknown				2	2	2
47	TRUE	Empty	Aspartate aminotransferase OS=Escherichia coli (strain K12) GN=aspC PE=1 SV=1	AAT_ECOLI	aspC	44 kDa		unknown			2	2	2
48	TRUE	Empty	FKBP-type 22 kDa peptidyl-prolyl cis-trans isomerase OS=Escherichia coli (strain K12) GN=fklB PE=1 SV=2	FKBB_ECOLI	fklB	22 kDa		unknown			2	2	2
49	TRUE	Empty	Bifunctional polymyxin resistance protein ArnA OS=Escherichia coli O127:H6 (strain E2348/69 / EPEC) GN=arnA PE=3 SV=1	ARNA_ECO27 (+9)	arnA	74 kDa		unknown		2	4
50	TRUE	Empty	Hexitol phosphatase B OS=Escherichia coli O157:H7 GN=hxpB PE=3 SV=1	HXPB_ECO57 (+1)	hxpB	24 kDa		unknown			4
51	TRUE	Empty	Superoxide dismutase [Fe] OS=Escherichia coli O157:H7 GN=sodB PE=3 SV=2	SODF_ECO57 (+2)	sodB	21 kDa		unknown					4
52	TRUE	Empty	50S ribosomal protein L5 OS=Escherichia coli O139:H28 (strain E24377A / ETEC) GN=rplE PE=3 SV=1	RL5_ECO24 (+20)	rplE	20 kDa		unknown				4
53	TRUE	Empty	5'-methylthioadenosine/S-adenosylhomocysteine nucleosidase OS=Escherichia coli O139:H28 (strain E24377A / ETEC) GN=mtnN PE=3 SV=1	MTNN_ECO24 (+20)	mtnN	24 kDa		unknown					2	2
54	TRUE	Empty	Translation initiation factor IF-3 OS=Escherichia coli O127:H6 (strain E2348/69 / EPEC) GN=infC PE=3 SV=1	IF3_ECO27 (+5)	infC	21 kDa		unknown				2	2
55	TRUE	Empty	Acetylglutamate kinase OS=Escherichia coli (strain K12) GN=argB PE=1 SV=1	ARGB_ECOLI (+15)	argB	27 kDa		unknown			2		2
56	TRUE	Empty	30S ribosomal protein S6 OS=Escherichia coli O139:H28 (strain E24377A / ETEC) GN=rpsF PE=3 SV=1	RS6_ECO24 (+19)	rpsF	15 kDa		unknown		2			2
57	TRUE	Empty	Aconitate hydratase B OS=Escherichia coli (strain K12) GN=acnB PE=1 SV=3	ACNB_ECOLI	acnB	94 kDa		unknown		4
58	TRUE	Empty	Malonyl CoA-acyl carrier protein transacylase OS=Escherichia coli O6:H1 (strain CFT073 / ATCC 700928 / UPEC) GN=fabD PE=3 SV=2	FABD_ECOL6 (+2)	fabD	32 kDa		unknown	2	2
59	TRUE	Empty	Transcription termination factor Rho OS=Escherichia coli O157:H7 GN=rho PE=3 SV=1	RHO_ECO57 (+2)	rho	47 kDa		unknown		2	2
60	TRUE	Empty	Uncharacterized protein YciO OS=Escherichia coli (strain K12) GN=yciO PE=1 SV=1	YCIO_ECOLI	yciO	23 kDa		unknown			2	2
61	TRUE	Empty	Probable phosphatase YcdX OS=Escherichia coli O139:H28 (strain E24377A / ETEC) GN=ycdX PE=3 SV=1	YCDX_ECO24 (+20)	ycdX	27 kDa		unknown						2
62	TRUE	Empty	Carbonic anhydrase 2 OS=Escherichia coli (strain K12) GN=can PE=1 SV=1	CAN_ECOLI	can	25 kDa		unknown				2
63	TRUE	Empty	Glutamine-binding periplasmic protein OS=Escherichia coli O157:H7 GN=glnH PE=3 SV=1	GLNH_ECO57 (+2)	glnH	27 kDa		unknown				2
64	TRUE	Empty	ATP-dependent protease subunit HslV OS=Escherichia coli O139:H28 (strain E24377A / ETEC) GN=hslV PE=3 SV=1	HSLV_ECO24 (+20)	hslV	19 kDa		unknown				2
65	TRUE	Empty	Probable phospholipid-binding protein MlaC OS=Escherichia coli (strain K12) GN=mlaC PE=1 SV=1	MLAC_ECOLI	mlaC	24 kDa		unknown				2
66	TRUE	Empty	Riboflavin synthase OS=Escherichia coli (strain K12) GN=ribC PE=1 SV=1	RISA_ECOLI	ribC	23 kDa		unknown				2
67	TRUE	Empty	Uncharacterized Nudix hydrolase YfcD OS=Escherichia coli (strain K12) GN=yfcD PE=1 SV=1	YFCD_ECOLI	yfcD	20 kDa		unknown				2
68	TRUE	Empty	Glutamine synthetase OS=Escherichia coli O157:H7 GN=glnA PE=3 SV=2	GLN1B_ECO57 (+1)	glnA	52 kDa		unknown					2
69	TRUE	Empty	Protein GrpE OS=Escherichia coli O139:H28 (strain E24377A / ETEC) GN=grpE PE=3 SV=1	GRPE_ECO24 (+19)	grpE	22 kDa		unknown					2
70	TRUE	Empty	Adenylate kinase OS=Escherichia coli O139:H28 (strain E24377A / ETEC) GN=adk PE=3 SV=1	KAD_ECO24 (+17)	adk	24 kDa		unknown					2
71	TRUE	Empty	Pyridoxine/pyridoxamine 5'-phosphate oxidase OS=Escherichia coli O139:H28 (strain E24377A / ETEC) GN=pdxH PE=3 SV=1	PDXH_ECO24 (+19)	pdxH	26 kDa		unknown					2
72	TRUE	Empty	FKBP-type peptidyl-prolyl cis-trans isomerase SlyD OS=Escherichia coli O157:H7 GN=slyD PE=3 SV=1	SLYD_ECO57 (+2)	slyD	21 kDa		unknown					2
73	TRUE	Empty	Mechanosensitive channel MscK OS=Escherichia coli (strain K12) GN=mscK PE=1 SV=1	MSCK_ECOLI	mscK	127 kDa		unknown						2
74	TRUE	Empty	Isocitrate lyase OS=Escherichia coli O6:H1 (strain CFT073 / ATCC 700928 / UPEC) GN=aceA PE=3 SV=1	ACEA_ECOL6 (+1)	aceA	48 kDa		unknown		2
75	TRUE	Empty	Undecaprenyl-phosphate 4-deoxy-4-formamido-L-arabinose transferase OS=Escherichia coli O139:H28 (strain E24377A / ETEC) GN=arnC PE=3 SV=1	ARNC_ECO24 (+20)	arnC	36 kDa		unknown		2
76	TRUE	Empty	Enoyl-[acyl-carrier-protein] reductase [NADH] FabI OS=Escherichia coli O157:H7 GN=fabI PE=3 SV=2	FABI_ECO57 (+1)	fabI	28 kDa		unknown		2
77	TRUE	Empty	Protein deglycase HchA OS=Escherichia coli O139:H28 (strain E24377A / ETEC) GN=hchA PE=3 SV=1	HCHA_ECO24 (+19)	hchA	31 kDa		unknown		2
78	TRUE	Empty	N-acetylneuraminate lyase OS=Escherichia coli O139:H28 (strain E24377A / ETEC) GN=nanA PE=3 SV=1	NANA_ECO24 (+15)	nanA	33 kDa		unknown		2
79	TRUE	Empty	Aspartate carbamoyltransferase OS=Escherichia coli O139:H28 (strain E24377A / ETEC) GN=pyrB PE=3 SV=1	PYRB_ECO24 (+20)	pyrB	34 kDa		unknown		2
80	TRUE	Empty	Thioredoxin reductase OS=Escherichia coli O157:H7 GN=trxB PE=3 SV=2	TRXB_ECO57 (+1)	trxB	35 kDa		unknown		2
81	TRUE	Empty	Uncharacterized protein YncE OS=Escherichia coli O157:H7 GN=yncE PE=3 SV=1	YNCE_ECO57 (+1)	yncE	39 kDa		unknown		2
82	TRUE	Empty	Elongation factor G OS=Escherichia coli O139:H28 (strain E24377A / ETEC) GN=fusA PE=3 SV=1	EFG_ECO24 (+20)	fusA	78 kDa		unknown			2
83	TRUE	Empty	Orotate phosphoribosyltransferase OS=Escherichia coli O139:H28 (strain E24377A / ETEC) GN=pyrE PE=3 SV=1	PYRE_ECO24 (+18)	pyrE	24 kDa		unknown			2
84	TRUE	Empty	Succinate dehydrogenase flavoprotein subunit OS=Escherichia coli O157:H7 GN=sdhA PE=3 SV=1	SDHA_ECO57 (+2)	sdhA	64 kDa		unknown			2
85	TRUE	Empty	Glutaredoxin 1 OS=Escherichia coli (strain K12) GN=grxA PE=1 SV=1	GLRX1_ECOLI	grxA	10 kDa		unknown						2
86	TRUE	Empty	Glutathione S-transferase GstA OS=Escherichia coli O157:H7 GN=gstA PE=3 SV=1	GSTA_ECO57 (+1)	gstA	23 kDa		unknown			2
87	TRUE	Empty	50S ribosomal protein L7/L12 OS=Escherichia coli O139:H28 (strain E24377A / ETEC) GN=rplL PE=3 SV=1	RL7_ECO24 (+18)	rplL	12 kDa		unknown			2
88	TRUE	Empty	ATP synthase subunit beta OS=Escherichia coli (strain 55989 / EAEC) GN=atpD PE=3 SV=1	ATPB_ECO55 (+4)	atpD	50 kDa		unknown		2
89	TRUE	Empty	2-succinyl-5-enolpyruvyl-6-hydroxy-3-cyclohexene-1-carboxylate synthase OS=Escherichia coli O139:H28 (strain E24377A / ETEC) GN=menD PE=3 SV=1	MEND_ECO24 (+6)	menD	61 kDa		unknown						2
90	TRUE	Empty	tRNA nuclease CdiA OS=Escherichia coli O157:H7 (strain EC869) GN=cdiA1 PE=3 SV=1	CDIA1_ECO5C (+2)	cdiA1	327 kDa		unknown				2
91	TRUE	Empty	tRNA 5-carboxymethoxyuridine methyltransferase OS=Escherichia coli (strain K12) GN=cmoM PE=1 SV=2	CMOM_ECOLI	cmoM	30 kDa		unknown						2
END OF FILE

## Sheet: ProteinIdentificationProbabilit
20180213_A.J.Zouwen, Samples report created on 06/15/2018
Experiment: 20180213_A.J.Zouwen
	Peak List Generator: unknown
		Version: unknown
		Charge States Calculated: unknown
		Deisotoped: unknown
		Textual Annotation: unknown
	Database Set: 1 Database
		Database Name: the escherichia_coli_reviewed_23022prot_prot_Max database
			Version: unknown
			Taxonomy: All Entries
			Number of Proteins: 23023
		Does database contain common contaminants?: unknown
	Search Engine Set: 1 Search Engine
		Search Engine: PEAKS Studio
			Version: 8.5 (2017-08-04)
			Samples: All Samples
			Fragment Tolerance: 0.50 Da (Monoisotopic)
			Parent Tolerance: 0.100 Da (Monoisotopic)
			Fixed Modifications: +57 on C (Carbamidomethyl)
			Variable Modifications: +1 on NQ (Deamidated), +16 on M (Oxidation)
			Database: the escherichia_coli_reviewed_23022prot_prot_Max database (unknown version, 23023 entries)
			Digestion Enzyme: Trypsin
			Max Missed Cleavages: 3
			Probability Model:
				04_AJZ_b_AT (peptides_1_0_0.mzid): Peptide Prophet with Delta Mass Correction (No decoys found) [all charge states]
				04_AJZ_b_AT (peptides_1_1_0.mzid): Peptide Prophet with Delta Mass Correction (No decoys found) [all charge states]
				06_AJZ_c_AT (peptides_1_0_0.mzid): Peptide Prophet with Delta Mass Correction (No decoys found) [all charge states]
				06_AJZ_c_AT (peptides_1_1_0.mzid): Peptide Prophet with Delta Mass Correction (No decoys found) [all charge states]
				07_AJZ_b_SF1 (peptides_1_0_0.mzid): Peptide Prophet with Delta Mass Correction (No decoys found) [all charge states]
				07_AJZ_b_SF1 (peptides_1_1_0.mzid): Peptide Prophet with Delta Mass Correction (No decoys found) [all charge states]
				08_AJZ_b_SF2 (peptides_1_0_0.mzid): Peptide Prophet with Delta Mass Correction (No decoys found) [all charge states]
				08_AJZ_b_SF2 (peptides_1_1_0.mzid): Peptide Prophet with Delta Mass Correction (No decoys found) [all charge states]
				12_AJZ_c_SF1 (peptides_1_0_0.mzid): Peptide Prophet with Delta Mass Correction (No decoys found) [all charge states]
				12_AJZ_c_SF1 (peptides_1_1_0.mzid): Peptide Prophet with Delta Mass Correction (No decoys found) [all charge states]
				13_AJZ_c_SF2 (peptides_1_0_0.mzid): Peptide Prophet with Delta Mass Correction (No decoys found) [all charge states]
				13_AJZ_c_SF2 (peptides_1_1_0.mzid): Peptide Prophet with Delta Mass Correction (No decoys found) [all charge states]
	Scaffold: Version: Scaffold_4.8.4
		Modification Metadata Set: 2334 modifications
			Source: C:\Program Files\Scaffold 4\parameters\unimod.xml
			Comment:
		Protein Grouping Strategy: Experiment-wide grouping with protein cluster analysis
		Peptide Thresholds: 20.0% minimum
		Protein Thresholds: 20.0% minimum and 1 peptide minimum
		Peptide FDR: 3.3% (Prophet)
		Protein FDR: 2.8% (Prophet)
		GO Annotation Source(s):
		Alternate ID Source(s): FASTA:UniProt/Swiss-Prot (UniProtKB)
									Protein Identification Probability	Protein Identification Probability	Protein Identification Probability	Protein Identification Probability	Protein Identification Probability	Protein Identification Probability
20180213_A.J.Zouwen									Uncategorized Sample	Uncategorized Sample	Uncategorized Sample	Uncategorized Sample	Uncategorized Sample	Uncategorized Sample
#	Visible?	Starred?	Identified Proteins (91)	Accession Number	Alternate ID	Molecular Weight	Protein Grouping Ambiguity	Taxonomy	b_AT	c_AT	b_SF1	b_SF2	c_SF1	c_SF2
1	TRUE	Empty	Bifunctional ligase/repressor BirA OS=Escherichia coli (strain K12) GN=birA PE=1 SV=1	BIRA_ECOLI	birA	35 kDa		unknown	1	1	1	1	1	1
2	TRUE	Empty	Chloramphenicol acetyltransferase OS=Escherichia coli GN=cat PE=1 SV=1	CAT_ECOLX	cat	26 kDa		unknown			1	1	1	1
3	TRUE	Empty	60 kDa chaperonin 1 OS=Escherichia coli O1:K1 / APEC GN=groL1 PE=3 SV=1	CH601_ECOK1 (+19)	groL1	57 kDa		unknown	1	1	1	1	1	1
4	TRUE	Empty	30S ribosomal protein S4 OS=Escherichia coli O139:H28 (strain E24377A / ETEC) GN=rpsD PE=3 SV=1	RS4_ECO24 (+20)	rpsD	23 kDa		unknown			1	1	1	1
5	TRUE	Empty	Maltose-binding periplasmic protein OS=Escherichia coli O157:H7 GN=malE PE=1 SV=1	MALE_ECO57 (+1)	malE	43 kDa		unknown	1	1	1	1	1	1
6	TRUE	Empty	Elongation factor Tu 1 OS=Escherichia coli O139:H28 (strain E24377A / ETEC) GN=tuf1 PE=3 SV=1	EFTU1_ECO24 (+15)	tuf1	43 kDa		unknown	1	1	1	1	1	1
7	TRUE	Empty	3-oxoacyl-[acyl-carrier-protein] reductase FabG OS=Escherichia coli (strain K12) GN=fabG PE=1 SV=1	FABG_ECOLI	fabG	26 kDa		unknown			1	1	1	1
8	TRUE	Empty	Glyceraldehyde-3-phosphate dehydrogenase A OS=Escherichia coli O157:H7 GN=gapA PE=3 SV=2	G3P1_ECO57 (+2)	gapA	36 kDa		unknown	1	1	1	1	0.99
9	TRUE	Empty	Outer membrane protein F OS=Escherichia coli (strain K12) GN=ompF PE=1 SV=1	OMPF_ECOLI	ompF	39 kDa		unknown	1	1	1	0.97	1	0.97
10	TRUE	Empty	50S ribosomal protein L4 OS=Escherichia coli O139:H28 (strain E24377A / ETEC) GN=rplD PE=3 SV=1	RL4_ECO24 (+20)	rplD	22 kDa		unknown			1	1	1
11	TRUE	Empty	Uracil phosphoribosyltransferase OS=Escherichia coli O139:H28 (strain E24377A / ETEC) GN=upp PE=3 SV=1	UPP_ECO24 (+19)	upp	23 kDa		unknown			1	1	1	0.65
12	TRUE	Empty	cAMP-activated global transcriptional regulator CRP OS=Escherichia coli O157:H7 GN=crp PE=3 SV=1	CRP_ECO57 (+2)	crp	24 kDa		unknown			1	1	1	1
13	TRUE	Empty	FMN-dependent NADH-azoreductase OS=Escherichia coli O139:H28 (strain E24377A / ETEC) GN=azoR PE=3 SV=1	AZOR_ECO24 (+2)	azoR	22 kDa		unknown			1	1	0.99
14	TRUE	Empty	Malate dehydrogenase OS=Escherichia coli O139:H28 (strain E24377A / ETEC) GN=mdh PE=3 SV=1	MDH_ECO24 (+17)	mdh	32 kDa		unknown	1	1		0.99	0.99	0.99
15	TRUE	Empty	Transaldolase OS=Escherichia coli O104:H4 (strain 2009EL-2071) GN=tal PE=1 SV=1	TAL_ECO1E	tal	35 kDa		unknown	1	1	1	1	0.99
16	TRUE	Empty	30S ribosomal protein S3 OS=Escherichia coli O139:H28 (strain E24377A / ETEC) GN=rpsC PE=3 SV=1	RS3_ECO24 (+19)	rpsC	26 kDa		unknown			1	1	1	1
17	TRUE	Empty	Alkyl hydroperoxide reductase subunit C OS=Escherichia coli O157:H7 GN=ahpC PE=3 SV=2	AHPC_ECO57 (+2)	ahpC	21 kDa		unknown		0.99	1	1	1
18	TRUE	Empty	KHG/KDPG aldolase OS=Escherichia coli O157:H7 GN=eda PE=3 SV=1	ALKH_ECO57 (+2)	eda	22 kDa		unknown			1	0.99	0.99	0.99
19	TRUE	Empty	Cysteine synthase A OS=Escherichia coli O157:H7 GN=cysK PE=3 SV=2	CYSK_ECO57 (+1)	cysK	34 kDa		unknown	1	1
20	TRUE	Empty	Elongation factor Ts OS=Escherichia coli (strain 55989 / EAEC) GN=tsf PE=3 SV=1	EFTS_ECO55 (+19)	tsf	30 kDa		unknown	1	1		0.99
21	TRUE	Empty	50S ribosomal protein L6 OS=Escherichia coli O139:H28 (strain E24377A / ETEC) GN=rplF PE=3 SV=1	RL6_ECO24 (+20)	rplF	19 kDa		unknown			1	1
22	TRUE	Empty	Outer membrane protein A OS=Escherichia coli O157:H7 GN=ompA PE=3 SV=1	OMPA_ECO57 (+1)	ompA	37 kDa		unknown	1	1
23	TRUE	Empty	50S ribosomal protein L2 OS=Escherichia coli O139:H28 (strain E24377A / ETEC) GN=rplB PE=3 SV=1	RL2_ECO24 (+20)	rplB	30 kDa		unknown			1	1	1
24	TRUE	Empty	Purine nucleoside phosphorylase DeoD-type OS=Escherichia coli O6:H1 (strain CFT073 / ATCC 700928 / UPEC) GN=deoD PE=3 SV=2	DEOD_ECOL6	deoD	26 kDa		unknown			1	1	1	1
25	TRUE	Empty	Elongation factor P OS=Escherichia coli O139:H28 (strain E24377A / ETEC) GN=efp PE=3 SV=1	EFP_ECO24 (+20)	efp	21 kDa		unknown			1	0.99	1	0.51
26	TRUE	Empty	50S ribosomal protein L3 OS=Escherichia coli O139:H28 (strain E24377A / ETEC) GN=rplC PE=3 SV=1	RL3_ECO24 (+20)	rplC	22 kDa		unknown			1	1	1	0.99
27	TRUE	Empty	Chaperone protein DnaK OS=Escherichia coli O139:H28 (strain E24377A / ETEC) GN=dnaK PE=3 SV=1	DNAK_ECO24 (+8)	dnaK	69 kDa		unknown			1
28	TRUE	Empty	Glyoxylate/hydroxypyruvate reductase A OS=Escherichia coli O127:H6 (strain E2348/69 / EPEC) GN=ghrA PE=3 SV=1	GHRA_ECO27 (+18)	ghrA	35 kDa		unknown		1
29	TRUE	Empty	Ribose-phosphate pyrophosphokinase OS=Escherichia coli O157:H7 GN=prs PE=3 SV=2	KPRS_ECO57 (+2)	prs	34 kDa		unknown	0.97	1
30	TRUE	Empty	Pyruvate dehydrogenase E1 component OS=Escherichia coli O157:H7 GN=aceE PE=1 SV=2	ODP1_ECO57 (+1)	aceE	100 kDa		unknown			1	0.99	1
31	TRUE	Empty	Superoxide dismutase [Mn] OS=Escherichia coli O157:H7 GN=sodA PE=3 SV=2	SODM_ECO57 (+1)	sodA	23 kDa		unknown			1
32	TRUE	Empty	Oxygen-insensitive NAD(P)H nitroreductase OS=Escherichia coli (strain K12) GN=nfsB PE=1 SV=1	NFSB_ECOLI	nfsB	24 kDa		unknown				1
33	TRUE	Empty	3-oxoacyl-[acyl-carrier-protein] synthase 3 OS=Escherichia coli O6:K15:H31 (strain 536 / UPEC) GN=fabH PE=3 SV=1	FABH_ECOL5 (+8)	fabH	34 kDa		unknown	0.97	1
34	TRUE	Empty	Thioredoxin 1 OS=Escherichia coli O157:H7 GN=trxA PE=1 SV=2	THIO_ECO57 (+2)	trxA	12 kDa		unknown	0.97				1	0.99
35	TRUE	Empty	Oxygen-insensitive NADPH nitroreductase OS=Escherichia coli (strain K12) GN=nfsA PE=1 SV=2	NFSA_ECOLI	nfsA	27 kDa		unknown			0.99	0.99	1
36	TRUE	Empty	3-oxoacyl-[acyl-carrier-protein] synthase 2 OS=Escherichia coli O157:H7 GN=fabF PE=3 SV=2	FABF_ECO57 (+2)	fabF	43 kDa		unknown		1
37	TRUE	Empty	Succinate--CoA ligase [ADP-forming] subunit beta OS=Escherichia coli O139:H28 (strain E24377A / ETEC) GN=sucC PE=3 SV=1	SUCC_ECO24 (+14)	sucC	41 kDa		unknown			0.99	0.99	1
38	TRUE	Empty	Ribose-5-phosphate isomerase A OS=Escherichia coli O139:H28 (strain E24377A / ETEC) GN=rpiA PE=3 SV=1	RPIA_ECO24 (+19)	rpiA	23 kDa		unknown			0.99	1	0.99
39	TRUE	Empty	5-methyltetrahydropteroyltriglutamate--homocysteine methyltransferase OS=Escherichia coli O157:H7 (strain EC4115 / EHEC) GN=metE PE=3 SV=1	METE_ECO5E (+3)	metE	85 kDa		unknown		1			1
40	TRUE	Empty	Stringent starvation protein A OS=Escherichia coli O157:H7 GN=sspA PE=3 SV=2	SSPA_ECO57 (+2)	sspA	24 kDa		unknown					0.99	1
41	TRUE	Empty	Succinate dehydrogenase iron-sulfur subunit OS=Escherichia coli (strain K12) GN=sdhB PE=1 SV=1	SDHB_ECOLI	sdhB	27 kDa		unknown					1
42	TRUE	Empty	3-oxoacyl-[acyl-carrier-protein] synthase 1 OS=Escherichia coli O6:H1 (strain CFT073 / ATCC 700928 / UPEC) GN=fabB PE=3 SV=1	FABB_ECOL6 (+1)	fabB	43 kDa		unknown		1	0.99
43	TRUE	Empty	Serine hydroxymethyltransferase OS=Escherichia coli O139:H28 (strain E24377A / ETEC) GN=glyA PE=3 SV=1	GLYA_ECO24 (+20)	glyA	45 kDa		unknown			1
44	TRUE	Empty	D-tagatose-1,6-bisphosphate aldolase subunit GatZ OS=Escherichia coli O127:H6 (strain E2348/69 / EPEC) GN=gatZ PE=3 SV=1	GATZ_ECO27 (+9)	gatZ	47 kDa		unknown		1	0.99
45	TRUE	Empty	Citrate synthase OS=Escherichia coli (strain K12) GN=gltA PE=1 SV=1	CISY_ECOLI (+1)	gltA	48 kDa		unknown			0.96	1
46	TRUE	Empty	Molybdopterin adenylyltransferase OS=Escherichia coli O157:H7 GN=mog PE=3 SV=1	MOG_ECO57 (+1)	mog	21 kDa		unknown				0.99	0.99	0.99
47	TRUE	Empty	Aspartate aminotransferase OS=Escherichia coli (strain K12) GN=aspC PE=1 SV=1	AAT_ECOLI	aspC	44 kDa		unknown			0.99	0.99	0.99
48	TRUE	Empty	FKBP-type 22 kDa peptidyl-prolyl cis-trans isomerase OS=Escherichia coli (strain K12) GN=fklB PE=1 SV=2	FKBB_ECOLI	fklB	22 kDa		unknown			0.99	0.99	0.99
49	TRUE	Empty	Bifunctional polymyxin resistance protein ArnA OS=Escherichia coli O127:H6 (strain E2348/69 / EPEC) GN=arnA PE=3 SV=1	ARNA_ECO27 (+9)	arnA	74 kDa		unknown		0.99	0.99
50	TRUE	Empty	Hexitol phosphatase B OS=Escherichia coli O157:H7 GN=hxpB PE=3 SV=1	HXPB_ECO57 (+1)	hxpB	24 kDa		unknown			1
51	TRUE	Empty	Superoxide dismutase [Fe] OS=Escherichia coli O157:H7 GN=sodB PE=3 SV=2	SODF_ECO57 (+2)	sodB	21 kDa		unknown					1
52	TRUE	Empty	50S ribosomal protein L5 OS=Escherichia coli O139:H28 (strain E24377A / ETEC) GN=rplE PE=3 SV=1	RL5_ECO24 (+20)	rplE	20 kDa		unknown				0.99
53	TRUE	Empty	5'-methylthioadenosine/S-adenosylhomocysteine nucleosidase OS=Escherichia coli O139:H28 (strain E24377A / ETEC) GN=mtnN PE=3 SV=1	MTNN_ECO24 (+20)	mtnN	24 kDa		unknown					0.99	0.99
54	TRUE	Empty	Translation initiation factor IF-3 OS=Escherichia coli O127:H6 (strain E2348/69 / EPEC) GN=infC PE=3 SV=1	IF3_ECO27 (+5)	infC	21 kDa		unknown				0.99	0.99
55	TRUE	Empty	Acetylglutamate kinase OS=Escherichia coli (strain K12) GN=argB PE=1 SV=1	ARGB_ECOLI (+15)	argB	27 kDa		unknown			0.99		0.99
56	TRUE	Empty	30S ribosomal protein S6 OS=Escherichia coli O139:H28 (strain E24377A / ETEC) GN=rpsF PE=3 SV=1	RS6_ECO24 (+19)	rpsF	15 kDa		unknown		0.99			0.99
57	TRUE	Empty	Aconitate hydratase B OS=Escherichia coli (strain K12) GN=acnB PE=1 SV=3	ACNB_ECOLI	acnB	94 kDa		unknown		0.99
58	TRUE	Empty	Malonyl CoA-acyl carrier protein transacylase OS=Escherichia coli O6:H1 (strain CFT073 / ATCC 700928 / UPEC) GN=fabD PE=3 SV=2	FABD_ECOL6 (+2)	fabD	32 kDa		unknown	0.97	0.99
59	TRUE	Empty	Transcription termination factor Rho OS=Escherichia coli O157:H7 GN=rho PE=3 SV=1	RHO_ECO57 (+2)	rho	47 kDa		unknown		0.99	0.99
60	TRUE	Empty	Uncharacterized protein YciO OS=Escherichia coli (strain K12) GN=yciO PE=1 SV=1	YCIO_ECOLI	yciO	23 kDa		unknown			0.99	0.97
61	TRUE	Empty	Probable phosphatase YcdX OS=Escherichia coli O139:H28 (strain E24377A / ETEC) GN=ycdX PE=3 SV=1	YCDX_ECO24 (+20)	ycdX	27 kDa		unknown						0.99
62	TRUE	Empty	Carbonic anhydrase 2 OS=Escherichia coli (strain K12) GN=can PE=1 SV=1	CAN_ECOLI	can	25 kDa		unknown				0.99
63	TRUE	Empty	Glutamine-binding periplasmic protein OS=Escherichia coli O157:H7 GN=glnH PE=3 SV=1	GLNH_ECO57 (+2)	glnH	27 kDa		unknown				0.99
64	TRUE	Empty	ATP-dependent protease subunit HslV OS=Escherichia coli O139:H28 (strain E24377A / ETEC) GN=hslV PE=3 SV=1	HSLV_ECO24 (+20)	hslV	19 kDa		unknown				0.99
65	TRUE	Empty	Probable phospholipid-binding protein MlaC OS=Escherichia coli (strain K12) GN=mlaC PE=1 SV=1	MLAC_ECOLI	mlaC	24 kDa		unknown				0.99
66	TRUE	Empty	Riboflavin synthase OS=Escherichia coli (strain K12) GN=ribC PE=1 SV=1	RISA_ECOLI	ribC	23 kDa		unknown				0.99
67	TRUE	Empty	Uncharacterized Nudix hydrolase YfcD OS=Escherichia coli (strain K12) GN=yfcD PE=1 SV=1	YFCD_ECOLI	yfcD	20 kDa		unknown				0.99
68	TRUE	Empty	Glutamine synthetase OS=Escherichia coli O157:H7 GN=glnA PE=3 SV=2	GLN1B_ECO57 (+1)	glnA	52 kDa		unknown					0.99
69	TRUE	Empty	Protein GrpE OS=Escherichia coli O139:H28 (strain E24377A / ETEC) GN=grpE PE=3 SV=1	GRPE_ECO24 (+19)	grpE	22 kDa		unknown					0.99
70	TRUE	Empty	Adenylate kinase OS=Escherichia coli O139:H28 (strain E24377A / ETEC) GN=adk PE=3 SV=1	KAD_ECO24 (+17)	adk	24 kDa		unknown					0.99
71	TRUE	Empty	Pyridoxine/pyridoxamine 5'-phosphate oxidase OS=Escherichia coli O139:H28 (strain E24377A / ETEC) GN=pdxH PE=3 SV=1	PDXH_ECO24 (+19)	pdxH	26 kDa		unknown					0.99
72	TRUE	Empty	FKBP-type peptidyl-prolyl cis-trans isomerase SlyD OS=Escherichia coli O157:H7 GN=slyD PE=3 SV=1	SLYD_ECO57 (+2)	slyD	21 kDa		unknown					0.99
73	TRUE	Empty	Mechanosensitive channel MscK OS=Escherichia coli (strain K12) GN=mscK PE=1 SV=1	MSCK_ECOLI	mscK	127 kDa		unknown						0.99
74	TRUE	Empty	Isocitrate lyase OS=Escherichia coli O6:H1 (strain CFT073 / ATCC 700928 / UPEC) GN=aceA PE=3 SV=1	ACEA_ECOL6 (+1)	aceA	48 kDa		unknown		0.99
75	TRUE	Empty	Undecaprenyl-phosphate 4-deoxy-4-formamido-L-arabinose transferase OS=Escherichia coli O139:H28 (strain E24377A / ETEC) GN=arnC PE=3 SV=1	ARNC_ECO24 (+20)	arnC	36 kDa		unknown		0.99
76	TRUE	Empty	Enoyl-[acyl-carrier-protein] reductase [NADH] FabI OS=Escherichia coli O157:H7 GN=fabI PE=3 SV=2	FABI_ECO57 (+1)	fabI	28 kDa		unknown		0.99
77	TRUE	Empty	Protein deglycase HchA OS=Escherichia coli O139:H28 (strain E24377A / ETEC) GN=hchA PE=3 SV=1	HCHA_ECO24 (+19)	hchA	31 kDa		unknown		0.99
78	TRUE	Empty	N-acetylneuraminate lyase OS=Escherichia coli O139:H28 (strain E24377A / ETEC) GN=nanA PE=3 SV=1	NANA_ECO24 (+15)	nanA	33 kDa		unknown		0.99
79	TRUE	Empty	Aspartate carbamoyltransferase OS=Escherichia coli O139:H28 (strain E24377A / ETEC) GN=pyrB PE=3 SV=1	PYRB_ECO24 (+20)	pyrB	34 kDa		unknown		0.99
80	TRUE	Empty	Thioredoxin reductase OS=Escherichia coli O157:H7 GN=trxB PE=3 SV=2	TRXB_ECO57 (+1)	trxB	35 kDa		unknown		0.99
81	TRUE	Empty	Uncharacterized protein YncE OS=Escherichia coli O157:H7 GN=yncE PE=3 SV=1	YNCE_ECO57 (+1)	yncE	39 kDa		unknown		0.99
82	TRUE	Empty	Elongation factor G OS=Escherichia coli O139:H28 (strain E24377A / ETEC) GN=fusA PE=3 SV=1	EFG_ECO24 (+20)	fusA	78 kDa		unknown			0.99
83	TRUE	Empty	Orotate phosphoribosyltransferase OS=Escherichia coli O139:H28 (strain E24377A / ETEC) GN=pyrE PE=3 SV=1	PYRE_ECO24 (+18)	pyrE	24 kDa		unknown			0.99
84	TRUE	Empty	Succinate dehydrogenase flavoprotein subunit OS=Escherichia coli O157:H7 GN=sdhA PE=3 SV=1	SDHA_ECO57 (+2)	sdhA	64 kDa		unknown			0.99
85	TRUE	Empty	Glutaredoxin 1 OS=Escherichia coli (strain K12) GN=grxA PE=1 SV=1	GLRX1_ECOLI	grxA	10 kDa		unknown						0.96
86	TRUE	Empty	Glutathione S-transferase GstA OS=Escherichia coli O157:H7 GN=gstA PE=3 SV=1	GSTA_ECO57 (+1)	gstA	23 kDa		unknown			0.95
87	TRUE	Empty	50S ribosomal protein L7/L12 OS=Escherichia coli O139:H28 (strain E24377A / ETEC) GN=rplL PE=3 SV=1	RL7_ECO24 (+18)	rplL	12 kDa		unknown			0.88
88	TRUE	Empty	ATP synthase subunit beta OS=Escherichia coli (strain 55989 / EAEC) GN=atpD PE=3 SV=1	ATPB_ECO55 (+4)	atpD	50 kDa		unknown		0.81
89	TRUE	Empty	2-succinyl-5-enolpyruvyl-6-hydroxy-3-cyclohexene-1-carboxylate synthase OS=Escherichia coli O139:H28 (strain E24377A / ETEC) GN=menD PE=3 SV=1	MEND_ECO24 (+6)	menD	61 kDa		unknown						0.68
90	TRUE	Empty	tRNA nuclease CdiA OS=Escherichia coli O157:H7 (strain EC869) GN=cdiA1 PE=3 SV=1	CDIA1_ECO5C (+2)	cdiA1	327 kDa		unknown				0.32
91	TRUE	Empty	tRNA 5-carboxymethoxyuridine methyltransferase OS=Escherichia coli (strain K12) GN=cmoM PE=1 SV=2	CMOM_ECOLI	cmoM	30 kDa		unknown						0.29
END OF FILE
